# Supplementary material for: CMV-independent increase in CD27−CD28+ CD8+ EMRA T cells is inversely related to mortality in octogenarians
Source: Springer Nature journal article supplement (doi:10.1038/s41514-019-0041-y), 2020-01-21

## **Martin-Ruiz et al.: Online Supplementary Information**

### **Supplementary Tables**

Supplementary Tables 1. Baseline characteristics by gender

Supplementary Tables 2. Biomarkers by gender

Supplementary Tables 3. 8-colour results by gender

Supplementary Tables 4. 8-colour results by previous MI

Supplementary Tables 5. 8-colour results by CMV

Supplementary Tables 6. 8-colour results by CMV and gender

Supplementary Tables 7. Cox Regression Analysis for cardiovascular and non-cardiovascular mortality

### **Supplementary Figures**

Supplementary Figures 1. Phenotype of CD8 T cells in young (<55 years) and elderly (>86 years) participants.

Supplementary Figure 2: Mouse flow-cytometry gating scheme

Supplementary Figures 3. Flowchart on covariates selection.

Supplementary Table 1. Baseline Characteristics and Gender

| <i><b>GENDER</b></i>                                      | Male                | Female              | p value          |   |
|-----------------------------------------------------------|---------------------|---------------------|------------------|---|
|                                                           | N=225               | N=372               |                  |   |
| BMI (median, [IQR])                                       | 24.6 [22.36, 27.33] | 24.2 [21.51, 27.33] |                  |   |
| CMV POSITIVE (%)                                          | 84.4%               | 86.0%               | 0.597            | † |
| Smoking (%)                                               |                     |                     |                  |   |
| Never                                                     | 27.7%               | 42.0%               |                  |   |
| Current                                                   | 2.7%                | 6.2%                | <b>0.000</b>     | † |
| Former - Regular                                          | 66.5%               | 45.0%               |                  |   |
| Former - Occasional                                       | 3.1%                | 6.7%                |                  |   |
| Institutional Housing (%)                                 | 5.8%                | 9.5%                | <b>0.039</b>     | † |
| Education (more than 11y) (%)                             | 15.2%               | 13.9%               | 0.819            | † |
| CVD (%)                                                   | 56.4%               | 46.0%               | <b>0.013</b>     | † |
| CVD - Atherosclerotic disease (%) <sup>1</sup>            | 53.3%               | 42.9%               | <b>0.013</b>     | † |
| CVD - Cerebrovascular Disease (%) <sup>1</sup>            | 21.8%               | 17.8%               | 0.232            | † |
| CVD - Peripheral Vascular Disease (%) <sup>1</sup>        | 8.4%                | 5.4%                | 0.144            | † |
| CVD - Heart Failure (%) <sup>1</sup>                      | 9.8%                | 9.2%                | 0.804            | † |
| CHD (%)                                                   | 35.6%               | 29.6%               | 0.134            | † |
| CHD - Angina (%) <sup>1</sup>                             | 33.3%               | 27.5%               | 0.130            | † |
| CHD - MI (%) <sup>1</sup>                                 | 20.0%               | 11.1%               | <b>0.003</b>     | † |
| Hypertension (%)                                          | 55.1%               | 59.3%               | 0.316            | † |
| Diabetes (%)                                              | 13.3%               | 12.4%               | 0.740            | † |
| Anemia (WHO's Guideline) (%)                              | 29.5%               | 23.6%               | 0.122            | † |
| Rheumatoid Arthritis (%)                                  | 0.4%                | 2.4%                | 0.068            | † |
| Cancer, any (%)                                           | 26.2%               | 21.3%               | 0.167            | † |
| Cancer, any (Excluding B&S, <5 years since diagnosis) (%) | 7.6%                | 5.4%                | 0.288            | † |
| Renal Impairment CKD-Epi (%)                              | 23.4%               | 23.7%               | 0.944            | † |
| Use of beta-blockers (%)                                  | 28.0%               | 27.8%               | 0.950            | † |
| Frailty by Fried Index (%)                                | 11.2%               | 22.9%               | <b>0.000</b>     | † |
| Rockwood frailty index (median, [IQR]) <sup>a</sup>       | 0.17 [0.11, 0.23]   | 0.2 [0.13, 0.28]    | <b>0.000</b>     | * |
| Survival (%) May 2015                                     | 24.9%               | 37.1%               | <b>0.002</b>     | * |
| Cause Mortality (%)                                       |                     |                     |                  |   |
| Death from MI or Stroke [N]                               | 30.2% [68]          | 21.8% [81]          | <b>0.004</b>     | † |
| Death from other than MI or Stroke [N]                    | 44.9% [101]         | 41.1% [153]         |                  |   |
| Follow-up time (in months) (median, [IQR]) May2015        | 48 [25, 83]         | 67 [35, 89]         | <b>&lt;0.001</b> | * |

\* Mann-Whitney; † Chi-Square; <sup>1</sup> Numbers refer to % of total population and some patients may have multiple entries.  
 CHD=Coronary Heart disease= Myocardial Infarction, Angina, Coronary Artery Bypass Graft or Coronary Angioplasty / Stent  
 CVD= Cardiovascular disease= Cerebrovascular disease, Peripheral vascular disease, Heart Failure and Atherosclerotic Disease.

Supplementary Table 2. Biomarkers by Gender

| <b>GENDER</b>                                                 | Male                     | Female                  | p value      |   |
|---------------------------------------------------------------|--------------------------|-------------------------|--------------|---|
|                                                               | N=225                    | N=372                   |              |   |
| <b>Haematological markers</b>                                 |                          |                         |              |   |
| Red blood cell count (x 10 <sup>12</sup> /l) (median, [IQR])  | 4.39 [4.06, 4.75]        | 4.27 [3.94, 4.57]       | <b>0.001</b> | * |
| White blood cell count (x 10 <sup>9</sup> /l) (median, [IQR]) | 6.40 [5.40, 7.50]        | 6.60 [5.50, 7.90]       | 0.124        | * |
| Platelets (x 10 <sup>9</sup> /l) (median, [IQR])              | 231.00 [195.00, 272.50]  | 265.00 [226.00, 311.00] | <b>0.000</b> | * |
| Neutrophils (x 10 <sup>9</sup> /l) (median, [IQR])            | 3.76 [3.08, 4.73]        | 3.94 [3.23, 4.98]       | 0.183        | * |
| Monocytes (x 10 <sup>9</sup> /l) (median, [IQR])              | 0.54 [0.43, 0.66]        | 0.50 [0.41, 0.63]       | 0.054        | * |
| Lymphocytes (x 10 <sup>9</sup> /l) (median, [IQR])            | 1.55 [1.23, 1.98]        | 1.70 [1.35, 2.16]       | <b>0.003</b> | * |
| Haemoglobin (g/dl) (median, [IQR])                            | 13.40 [12.40, 14.50]     | 12.80 [11.80, 13.70]    | <b>0.000</b> | * |
| Basophils (x 10 <sup>9</sup> /l) (median, [IQR])              | 0.04 [0.02, 0.06]        | 0.04 [0.02, 0.05]       | 0.685        | * |
| Eosinophils (x 10 <sup>9</sup> /l) (median, [IQR])            | 0.22 [0.15, 0.33]        | 0.19 [0.11, 0.28]       | <b>0.001</b> | * |
| <b>Metabolic Markers</b>                                      |                          |                         |              |   |
| Total Cholesterol (mmol/l) (median, [IQR])                    | 4.50 [3.80, 5.20]        | 5.20 [4.30, 6.00]       | <b>0.000</b> | * |
| Triglycerides (mmol/l) (median, [IQR])                        | 1.10 [0.90, 1.50]        | 1.40 [1.00, 1.80]       | <b>0.000</b> | * |
| High Density Lipoprotein (HDL) (mmol/l) (median, [IQR])       | 1.30 [1.10, 1.60]        | 1.50 [1.30, 1.85]       | <b>0.000</b> | * |
| Low Density Lipoprotein (LDL) (mmol/l) (median, [IQR])        | 2.50 [1.80, 3.10]        | 2.80 [2.10, 3.70]       | <b>0.000</b> | * |
| Cholesterol/HDL Ratio (median, [IQR])                         | 3.30 [2.70, 3.90]        | 3.20 [2.70, 3.90]       | 0.952        | * |
| HbA1C (%) (median, [IQR])                                     | 5.90 [5.60, 6.10]        | 5.80 [5.60, 6.20]       | 0.442        | * |
| <b>Natriuretic Markers</b>                                    |                          |                         |              |   |
| proBNP (pg/ml) (median, [IQR])                                | 453.00 [231.00, 1306.00] | 396.00 [178.00, 748.00] | <b>0.034</b> | * |
| <b>Inflammatory and senescence-related Markers</b>            |                          |                         |              |   |
| Leptin (ng/ml) (median, [IQR])                                | 12.65 [7.61, 23.89]      | 27.00 [13.75, 52.09]    | <b>0.000</b> | * |
| Adiponectin (ug/ml) (median, [IQR])                           | 7.66 [4.84, 11.44]       | 9.05 [6.87, 13.13]      | <b>0.000</b> | * |
| ApoE4 carrier (%)                                             | 24.2%                    | 26.8%                   | 0.522        | † |
| Mitochondrial haplogroup J (%)                                | 13.2%                    | 10.5%                   | 0.831        | † |
| hsCRP (mg/l) (median, [IQR])                                  | 3.00 [1.20, 6.40]        | 2.60 [1.10, 5.80]       | 0.288        | * |
| LPS-stimulated IL-6 (ng/ml) (median, [IQR])                   | 10.15 [4.48, 16.49]      | 8.30 [4.89, 16.24]      | 0.243        | * |
| LPS-stimulated TNF alpha (pg/ml) (median, [IQR])              | 431.52 [208.69, 858.33]  | 381.74 [179.27, 678.91] | <b>0.041</b> | * |
| IGFBP1 (ng/ml) (median, [IQR])                                | 61.49 [35.67, 101.97]    | 62.40 [37.68, 101.91]   | 0.889        | * |
| IGFBP3 (ng/ml) (median, [IQR])                                | 712.61 [568.83, 833.08]  | 886.95 [760.90, 999.85] | <b>0.000</b> | * |
| TGFbeta (ng/ml) (median, [IQR])                               | 14.07 [11.03, 17.53]     | 15.68 [12.81, 19.24]    | <b>0.000</b> | * |
| Telomere length (kbp) (median, [IQR])                         | 3.80 [3.56, 4.00]        | 3.67 [3.44, 3.91]       | <b>0.001</b> | * |
| DNA Damage (%) (median, [IQR])                                | 45.27 [28.80, 64.32]     | 46.33 [29.88, 62.52]    | 0.959        | * |
| DNA Repair (%) (median, [IQR])                                | 41.43 [20.75, 62.95]     | 44.89 [22.97, 69.39]    | 0.309        | * |
| 8-iso Prostaglandin F2alpha (ng/ml) (median, [IQR])           | 1.18 [0.67, 1.69]        | 1.22 [0.75, 2.56]       | 0.247        | * |
| Telomerase activity (AU) (median, [IQR])                      | 0.90 [0.60, 1.46]        | 1.03 [0.66, 1.59]       | 0.161        | * |

\* Mann-Whitney; † Chi-Square

Supplementary Table 3. Immunosenescence Parametres by Gender

| GENDER               | Male                 | Female               | p-value<0.05 |
|----------------------|----------------------|----------------------|--------------|
|                      | N=225                | N=372                |              |
|                      | (%) Median [IQR]     | (%) Median [IQR]     |              |
| CD3+                 | 70.50 [63.60, 78.00] | 72.50 [64.40, 79.40] | *            |
| CD4                  | 60.20 [47.60, 71.80] | 65.60 [54.70, 77.20] | *            |
| CD4 CD27-CD28-       | 4.90 [0.90, 12.40]   | 3.20 [0.80, 9.70]    | *            |
| CD4 CD27-CD28+       | 5.70 [3.40, 9.90]    | 4.50 [2.50, 7.60]    | *            |
| CD4 CD27+CD28-       | 0.50 [0.30, 0.90]    | 0.60 [0.30, 1.00]    |              |
| CD4 CD27+CD28+       | 87.80 [75.30, 93.70] | 90.20 [81.50, 94.60] | *            |
| CD4 CM               | 36.10 [27.90, 43.70] | 31.50 [23.20, 40.50] | *            |
| CD4 CM CD27-CD28-    | 0.00 [0.00, 0.10]    | 0.00 [0.00, 0.10]    |              |
| CD4 CM CD27-CD28+    | 3.60 [2.40, 5.60]    | 3.20 [2.10, 4.60]    |              |
| CD4 CM CD27+CD28-    | 0.10 [0.00, 0.30]    | 0.10 [0.10, 0.30]    |              |
| CD4 CM CD27+CD28+    | 96.00 [93.90, 97.00] | 96.40 [94.90, 97.30] |              |
| CD4 EM               | 16.30 [10.30, 26.40] | 13.10 [8.50, 21.70]  | *            |
| CD4 EM CD27-CD28-    | 16.90 [4.90, 39.60]  | 16.70 [3.90, 35.70]  |              |
| CD4 EM CD27-CD28+    | 23.90 [18.30, 30.30] | 21.00 [16.40, 27.70] | *            |
| CD4 EM CD27+CD28-    | 0.40 [0.20, 0.60]    | 0.50 [0.20, 0.80]    |              |
| CD4 EM CD27+CD28+    | 51.30 [33.90, 68.30] | 55.90 [39.80, 72.40] | *            |
| CD4 NAIVE            | 37.40 [22.80, 48.80] | 47.20 [33.50, 58.80] | *            |
| CD4 NAIVE CD27-CD28- | 0.00 [0.00, 0.10]    | 0.00 [0.00, 0.00]    |              |
| CD4 NAIVE CD27-CD28+ | 0.10 [0.00, 0.20]    | 0.00 [0.00, 0.10]    |              |
| CD4 NAIVE CD27+CD28- | 0.40 [0.20, 0.80]    | 0.40 [0.20, 0.80]    |              |
| CD4 NAIVE CD27+CD28+ | 99.40 [98.80, 99.70] | 99.40 [98.90, 99.70] |              |
| CD4 TEMRA            | 1.40 [0.70, 3.60]    | 1.30 [0.70, 3.60]    |              |
| CD4 TEMRA CD27-CD28- | 38.15 [8.90, 72.20]  | 38.80 [10.50, 68.80] |              |
| CD4 TEMRA CD27-CD28+ | 10.85 [6.60, 18.00]  | 9.90 [5.40, 15.80]   |              |
| CD4 TEMRA CD27+CD28- | 1.20 [0.35, 2.75]    | 1.50 [0.60, 3.00]    |              |
| CD4 TEMRA CD27+CD28+ | 43.40 [12.05, 70.95] | 41.70 [17.70, 73.20] |              |
| CD8+                 | 30.10 [20.60, 43.20] | 24.80 [16.20, 36.40] | *            |
| CD8 CD27-CD28-       | 57.40 [32.60, 70.40] | 51.70 [31.00, 66.70] |              |
| CD8 CD27-CD28+       | 4.30 [2.80, 6.00]    | 3.50 [2.40, 5.00]    | *            |
| CD8 CD27+CD28-       | 9.00 [5.50, 15.10]   | 8.90 [5.90, 14.40]   |              |
| CD8 CD27+CD28+       | 27.00 [16.10, 46.30] | 32.60 [20.60, 52.10] | *            |
| CD8 CD45RA-CD27-     | 9.20 [5.10, 17.20]   | 6.70 [3.80, 11.80]   |              |
| CD8 CD45RA-CD27+     | 16.40 [9.50, 28.20]  | 17.60 [9.90, 28.40]  |              |
| CD8 CD45RA+CD27-     | 47.10 [29.00, 60.70] | 44.50 [25.80, 59.90] |              |
| CD8 CD45RA+CD27+     | 18.30 [11.40, 31.50] | 23.70 [15.20, 37.80] | *            |
| CD8 CM               | 6.30 [3.50, 12.30]   | 7.50 [4.20, 13.00]   |              |
| CD8 CM CD27-CD28-    | 0.70 [0.10, 1.90]    | 0.40 [0.10, 1.50]    |              |
| CD8 CM CD27-CD28+    | 5.80 [3.55, 8.35]    | 4.30 [2.50, 6.40]    | *            |
| CD8 CM CD27+CD28-    | 0.90 [0.30, 2.15]    | 1.10 [0.40, 1.90]    |              |
| CD8 CM CD27+CD28+    | 91.70 [87.25, 93.95] | 93.50 [89.80, 95.60] | *            |
| CD8 EM               | 21.80 [15.10, 31.70] | 18.90 [12.00, 25.70] | *            |
| CD8 EM CD27-CD28-    | 32.40 [12.10, 57.00] | 28.60 [12.50, 49.50] |              |
| CD8 EM CD27-CD28+    | 8.10 [5.10, 11.70]   | 7.00 [5.00, 10.70]   |              |
| CD8 EM CD27+CD28-    | 8.10 [4.90, 14.50]   | 9.10 [5.70, 14.30]   |              |
| CD8 EM CD27+CD28+    | 45.10 [24.00, 60.10] | 48.30 [31.20, 64.50] | *            |
| CD8 NAIVE            | 5.40 [2.10, 10.80]   | 8.50 [4.60, 18.00]   | *            |
| CD8 NAIVE CD27-CD28- | 1.10 [0.30, 3.80]    | 0.80 [0.30, 2.30]    |              |
| CD8 NAIVE CD27-CD28+ | 0.20 [0.00, 0.70]    | 0.10 [0.00, 0.50]    |              |
| CD8 NAIVE CD27+CD28- | 5.20 [3.20, 9.30]    | 5.10 [2.90, 7.80]    | *            |
| CD8 NAIVE CD27+CD28+ | 91.10 [86.20, 95.20] | 92.90 [87.80, 95.50] |              |
| CD8 TEMRA            | 54.90 [40.90, 68.10] | 54.20 [39.00, 68.60] |              |
| CD8 TEMRA CD27-CD28- | 78.40 [59.00, 87.60] | 76.40 [61.20, 85.40] |              |
| CD8 TEMRA CD27-CD28+ | 2.50 [1.70, 3.80]    | 2.50 [1.60, 4.10]    |              |
| CD8 TEMRA CD27+CD28- | 11.70 [5.90, 20.60]  | 12.00 [6.70, 20.30]  |              |
| CD8 TEMRA CD27+CD28+ | 5.80 [2.90, 12.40]   | 6.70 [3.50, 14.00]   |              |
| CD4/CD8 RATIO        | 2.07 [1.08, 3.42]    | 2.72 [1.53, 4.63]    | *            |
| CD3+ CD4- CD8-       | 4.40 [2.60, 7.90]    | 4.30 [2.50, 7.30]    |              |
| CD3+ CD4+ CD8+       | 0.60 [0.30, 1.20]    | 0.80 [0.50, 1.50]    | *            |

Supplementary Table 4. Immunosenescence Parametres by MI

|                      | No Myocardial Infarction | Myocardial Infarction   | <i>Mann-Whitney test</i> |
|----------------------|--------------------------|-------------------------|--------------------------|
|                      | <i>N=510</i>             | <i>N=86</i>             |                          |
|                      | (%) <i>Median [IQR]</i>  | (%) <i>Median [IQR]</i> | <i>p-value</i>           |
| CD3+                 | 71.75 [64.10,79.40]      | 71.80 [64.10,77.00]     | 0.842                    |
| CD4                  | 64.30 [50.70,75.50]      | 64.00 [49.30,76.30]     | 0.914                    |
| CD4 CD27-CD28-       | 3.60 [0.90,10.70]        | 3.00 [0.50,9.10]        | 0.443                    |
| CD4 CD27-CD28+       | 5.00 [2.90,8.50]         | 4.10 [2.40,7.60]        | 0.121                    |
| CD4 CD27+CD28-       | 0.50 [0.30,1.00]         | 0.50 [0.40,0.90]        | 0.311                    |
| CD4 CD27+CD28+       | 89.50 [79.50,94.00]      | 91.00 [79.80,94.60]     | 0.349                    |
| CD4 CM               | 33.05 [25.50,42.40]      | 33.00 [23.10,39.40]     | 0.188                    |
| CD4 CM CD27-CD28-    | 0.00 [0.00,0.10]         | 0.00 [0.00,0.10]        | 0.737                    |
| CD4 CM CD27-CD28+    | 3.40 [2.30,5.40]         | 3.10 [2.10,4.60]        | 0.217                    |
| CD4 CM CD27+CD28-    | 0.10 [0.10,0.30]         | 0.10 [0.00,0.40]        | 0.866                    |
| CD4 CM CD27+CD28+    | 96.30 [94.30,97.20]      | 96.00 [94.70,97.20]     | 0.905                    |
| CD4 EM               | 14.50 [9.30,23.50]       | 13.60 [6.60,21.70]      | 0.303                    |
| CD4 EM CD27-CD28-    | 16.95 [4.40,37.50]       | 11.60 [3.30,30.40]      | 0.243                    |
| CD4 EM CD27-CD28+    | 22.25 [16.90,29.30]      | 21.90 [16.40,26.10]     | 0.311                    |
| CD4 EM CD27+CD28-    | 0.40 [0.20,0.70]         | 0.60 [0.30,0.90]        | 0.015                    |
| CD4 EM CD27+CD28+    | 52.55 [36.90,70.50]      | 64.70 [39.00,72.50]     | 0.082                    |
| CD4 NAIVE            | 43.05 [29.40,55.70]      | 44.50 [25.60,61.50]     | 0.378                    |
| CD4 NAIVE CD27-CD28- | 0.00 [0.00,0.00]         | 0.00 [0.00,0.00]        | 0.892                    |
| CD4 NAIVE CD27-CD28+ | 0.10 [0.00,0.10]         | 0.00 [0.00,0.10]        | 0.403                    |
| CD4 NAIVE CD27+CD28- | 0.40 [0.20,0.80]         | 0.40 [0.20,0.70]        | 0.973                    |
| CD4 NAIVE CD27+CD28+ | 99.40 [98.90,99.70]      | 99.50 [98.90,99.70]     | 0.942                    |
| CD4 TEMRA            | 1.30 [0.60,3.60]         | 1.70 [0.90,3.80]        | 0.152                    |
| CD4 TEMRA CD27-CD28- | 36.80 [10.30,68.90]      | 42.60 [7.50,72.20]      | 0.887                    |
| CD4 TEMRA CD27-CD28+ | 10.40 [5.70,16.80]       | 9.70 [5.90,15.00]       | 0.355                    |
| CD4 TEMRA CD27+CD28- | 1.40 [0.50,2.90]         | 1.20 [0.40,2.80]        | 0.372                    |
| CD4 TEMRA CD27+CD28+ | 41.70 [16.20,71.70]      | 44.90 [16.40,74.50]     | 0.663                    |
| CD8+                 | 26.20 [17.80,39.00]      | 27.90 [16.20,43.00]     | 0.772                    |
| CD8 CD27-CD28-       | 52.95 [31.80,67.70]      | 54.60 [33.80,71.40]     | 0.369                    |
| CD8 CD27-CD28+       | 3.80 [2.60,5.50]         | 3.40 [2.40,5.40]        | 0.386                    |
| CD8 CD27+CD28-       | 9.00 [5.70,14.50]        | 8.70 [5.80,16.50]       | 0.635                    |
| CD8 CD27+CD28+       | 31.05 [18.60,50.80]      | 27.20 [18.40,44.70]     | 0.262                    |
| CD8 CD45RA-CD27-     | 7.50 [4.20,13.80]        | 7.10 [4.20,13.30]       | 0.973                    |
| CD8 CD45RA-CD27+     | 17.50 [9.80,29.60]       | 16.10 [8.60,23.90]      | 0.14                     |
| CD8 CD45RA+CD27-     | 44.90 [27.00,60.20]      | 46.50 [31.10,61.20]     | 0.494                    |
| CD8 CD45RA+CD27+     | 22.00 [14.10,35.00]      | 22.20 [13.60,33.90]     | 0.966                    |
| CD8 CM               | 7.25 [3.80,13.70]        | 6.10 [3.60,10.30]       | 0.098                    |
| CD8 CM CD27-CD28-    | 0.50 [0.10,1.60]         | 0.60 [0.10,2.80]        | 0.254                    |
| CD8 CM CD27-CD28+    | 4.80 [2.80,6.90]         | 4.80 [2.80,7.50]        | 0.623                    |
| CD8 CM CD27+CD28-    | 1.00 [0.40,1.90]         | 1.10 [0.40,2.40]        | 0.411                    |
| CD8 CM CD27+CD28+    | 92.90 [89.00,95.20]      | 91.70 [87.10,93.90]     | 0.039                    |
| CD8 EM               | 19.70 [13.20,27.70]      | 19.90 [12.10,28.80]     | 0.838                    |
| CD8 EM CD27-CD28-    | 30.30 [12.50,51.40]      | 29.60 [12.10,58.60]     | 0.861                    |
| CD8 EM CD27-CD28+    | 7.50 [5.00,11.00]        | 8.00 [4.50,11.20]       | 0.747                    |
| CD8 EM CD27+CD28-    | 8.85 [5.60,13.80]        | 7.70 [4.70,16.30]       | 0.467                    |
| CD8 EM CD27+CD28+    | 47.70 [29.10,64.00]      | 47.70 [24.30,60.60]     | 0.366                    |
| CD8 NAIVE            | 7.30 [3.60,15.30]        | 8.10 [3.20,14.60]       | 0.929                    |
| CD8 NAIVE CD27-CD28- | 0.90 [0.30,2.90]         | 1.20 [0.40,3.30]        | 0.223                    |
| CD8 NAIVE CD27-CD28+ | 0.20 [0.00,0.60]         | 0.20 [0.00,0.50]        | 0.786                    |
| CD8 NAIVE CD27+CD28- | 5.20 [3.05,8.45]         | 4.70 [3.20,9.10]        | 0.876                    |
| CD8 NAIVE CD27+CD28+ | 92.60 [87.45,95.40]      | 91.60 [86.10,95.20]     | 0.299                    |
| CD8 TEMRA            | 53.95 [39.40,68.10]      | 55.40 [42.10,70.50]     | 0.241                    |
| CD8 TEMRA CD27-CD28- | 77.10 [60.00,85.70]      | 77.80 [64.00,86.80]     | 0.6                      |
| CD8 TEMRA CD27-CD28+ | 2.50 [1.60,4.10]         | 2.40 [1.80,3.20]        | 0.413                    |
| CD8 TEMRA CD27+CD28- | 12.05 [6.60,20.40]       | 11.70 [6.90,21.60]      | 0.952                    |
| CD8 TEMRA CD27+CD28+ | 6.50 [3.40,13.90]        | 6.30 [3.10,11.60]       | 0.405                    |
| CD4/CD8 RATIO        | 2.41 [1.29,4.23]         | 2.23 [1.18,4.14]        | 0.831                    |
| CD3+ CD4- CD8-       | 4.20 [2.50,7.50]         | 4.60 [2.60,6.80]        | 0.995                    |
| CD3+ CD4+ CD8+       | 0.80 [0.40,1.40]         | 0.70 [0.40,1.10]        | 0.073                    |

Supplementary Table 5. Immunosenescence Parametres by CMV

|                      | CMV Negative            | CMV Positive            | <i>Mann-Whitney test p-value</i> |
|----------------------|-------------------------|-------------------------|----------------------------------|
|                      | <i>N=87</i>             | <i>N=510</i>            |                                  |
|                      | <i>(%) Median [IQR]</i> | <i>(%) Median [IQR]</i> |                                  |
| CD3+                 | 71.85 [62.30,77.50]     | 71.70 [64.30,79.30]     | 0.381                            |
| CD4                  | 77.10 [67.80,83.70]     | 62.25 [49.30,73.00]     | <b>0.000</b>                     |
| CD4 CD27-CD28-       | 0.20 [0.10,0.40]        | 4.95 [1.70,11.60]       | <b>0.001</b>                     |
| CD4 CD27-CD28+       | 3.30 [2.10,4.80]        | 5.40 [3.00,8.90]        | <b>0.000</b>                     |
| CD4 CD27+CD28-       | 0.75 [0.40,2.00]        | 0.50 [0.30,0.90]        | <b>0.000</b>                     |
| CD4 CD27+CD28+       | 94.75 [92.20,96.50]     | 88.45 [77.90,93.00]     | <b>0.000</b>                     |
| CD4 CM               | 37.55 [25.20,47.30]     | 32.20 [24.70,41.60]     | 0.437                            |
| CD4 CM CD27-CD28-    | 0.00 [0.00,0.00]        | 0.00 [0.00,0.10]        | 0.060                            |
| CD4 CM CD27-CD28+    | 3.00 [2.10,4.30]        | 3.45 [2.30,5.40]        | <b>0.000</b>                     |
| CD4 CM CD27+CD28-    | 0.10 [0.10,0.40]        | 0.10 [0.10,0.30]        | <b>0.004</b>                     |
| CD4 CM CD27+CD28+    | 0.10 [0.09,0.10]        | 96.20 [94.30,97.20]     | <b>0.000</b>                     |
| CD4 EM               | 10.40 [7.20,14.00]      | 15.60 [9.60,24.70]      | <b>0.025</b>                     |
| CD4 EM CD27-CD28-    | 0.95 [0.40,2.20]        | 20.60 [8.70,39.60]      | 0.336                            |
| CD4 EM CD27-CD28+    | 20.15 [15.20,25.10]     | 22.90 [17.60,29.30]     | 0.114                            |
| CD4 EM CD27+CD28-    | 0.65 [0.30,1.40]        | 0.40 [0.20,0.70]        | <b>0.000</b>                     |
| CD4 EM CD27+CD28+    | 76.15 [69.10,82.30]     | 50.40 [35.10,67.00]     | <b>0.048</b>                     |
| CD4 NAIVE            | 48.85 [36.70,63.80]     | 41.95 [28.00,55.30]     | <b>0.000</b>                     |
| CD4 NAIVE CD27-CD28- | 0.00 [0.00,0.00]        | 0.00 [0.00,0.10]        | <b>0.000</b>                     |
| CD4 NAIVE CD27-CD28+ | 0.00 [0.00,0.10]        | 0.10 [0.00,0.10]        | <b>0.000</b>                     |
| CD4 NAIVE CD27+CD28- | 0.50 [0.30,1.10]        | 0.40 [0.20,0.80]        | <b>0.010</b>                     |
| CD4 NAIVE CD27+CD28+ | 99.40 [98.70,99.60]     | 99.40 [98.90,99.70]     | <b>0.010</b>                     |
| CD4 TEMRA            | 0.70 [0.50,1.10]        | 1.60 [0.80,3.90]        | 0.347                            |
| CD4 TEMRA CD27-CD28- | 4.30 [1.80,10.00]       | 46.70 [18.00,72.20]     | <b>0.001</b>                     |
| CD4 TEMRA CD27-CD28+ | 9.05 [4.30,15.30]       | 10.40 [6.00,16.80]      | <b>0.002</b>                     |
| CD4 TEMRA CD27+CD28- | 2.25 [1.00,4.80]        | 1.20 [0.40,2.60]        | <b>0.000</b>                     |
| CD4 TEMRA CD27+CD28+ | 79.70 [69.30,87.80]     | 36.20 [13.90,64.20]     | <b>0.000</b>                     |
| CD8+                 | 15.20 [10.00,22.90]     | 29.30 [20.00,41.90]     | <b>0.000</b>                     |
| CD8 CD27-CD28-       | 14.10 [7.20,32.00]      | 57.40 [38.00,69.30]     | 0.053                            |
| CD8 CD27-CD28+       | 3.85 [2.60,5.60]        | 3.70 [2.60,5.40]        | <b>0.000</b>                     |
| CD8 CD27+CD28-       | 14.95 [7.80,22.80]      | 8.60 [5.50,13.40]       | <b>0.000</b>                     |
| CD8 CD27+CD28+       | 58.20 [44.70,73.80]     | 27.80 [17.60,43.60]     | <b>0.000</b>                     |
| CD8 CD45RA-CD27-     | 5.10 [2.70,9.40]        | 8.05 [4.60,14.60]       | <b>0.000</b>                     |
| CD8 CD45RA-CD27+     | 31.00 [21.60,43.90]     | 15.40 [9.10,25.30]      | 0.900                            |
| CD8 CD45RA+CD27-     | 12.90 [6.00,25.50]      | 49.00 [33.00,62.00]     | <b>0.000</b>                     |
| CD8 CD45RA+CD27+     | 37.95 [29.30,55.50]     | 19.50 [13.30,31.10]     | <b>0.000</b>                     |
| CD8 CM               | 12.95 [7.50,22.50]      | 6.10 [3.60,11.50]       | <b>0.000</b>                     |
| CD8 CM CD27-CD28-    | 0.20 [0.00,0.80]        | 0.60 [0.10,1.80]        | <b>0.000</b>                     |
| CD8 CM CD27-CD28+    | 4.35 [2.80,6.50]        | 4.90 [2.80,7.10]        | <b>0.000</b>                     |
| CD8 CM CD27+CD28-    | 0.95 [0.30,1.60]        | 1.00 [0.40,2.00]        | <b>0.008</b>                     |
| CD8 CM CD27+CD28+    | 93.70 [89.60,95.50]     | 92.40 [88.20,95.10]     | <b>0.000</b>                     |
| CD8 EM               | 22.80 [15.70,35.10]     | 19.50 [12.50,26.80]     | <b>0.000</b>                     |
| CD8 EM CD27-CD28-    | 7.35 [4.00,14.50]       | 34.70 [16.00,55.70]     | 0.644                            |
| CD8 EM CD27-CD28+    | 7.65 [5.20,11.70]       | 7.50 [5.00,10.90]       | 0.088                            |
| CD8 EM CD27+CD28-    | 12.10 [6.80,20.80]      | 8.50 [5.00,13.30]       | <b>0.000</b>                     |
| CD8 EM CD27+CD28+    | 64.00 [52.50,75.50]     | 43.85 [27.70,60.80]     | 0.462                            |
| CD8 NAIVE            | 14.55 [7.90,28.20]      | 6.45 [3.20,13.50]       | <b>0.000</b>                     |
| CD8 NAIVE CD27-CD28- | 0.30 [0.10,1.00]        | 1.10 [0.40,3.40]        | <b>0.000</b>                     |
| CD8 NAIVE CD27-CD28+ | 0.10 [0.00,0.30]        | 0.20 [0.00,0.60]        | <b>0.000</b>                     |
| CD8 NAIVE CD27+CD28- | 6.15 [3.60,10.90]       | 5.05 [3.00,8.30]        | 0.322                            |
| CD8 NAIVE CD27+CD28+ | 92.90 [88.60,95.70]     | 92.40 [86.90,95.30]     | 0.112                            |
| CD8 TEMRA            | 32.20 [18.40,50.30]     | 57.05 [43.70,69.60]     | 0.187                            |
| CD8 TEMRA CD27-CD28- | 35.80 [23.60,58.70]     | 79.40 [67.20,87.10]     | <b>0.000</b>                     |
| CD8 TEMRA CD27-CD28+ | 2.60 [1.60,3.90]        | 2.50 [1.60,3.90]        | <b>0.010</b>                     |
| CD8 TEMRA CD27+CD28- | 31.10 [18.80,41.00]     | 10.70 [5.80,17.60]      | <b>0.000</b>                     |
| CD8 TEMRA CD27+CD28+ | 22.95 [11.60,36.60]     | 5.80 [3.10,11.30]       | <b>0.000</b>                     |
| CD4/CD8 RATIO        | 5.03 [3.03,7.95]        | 2.18 [1.18,3.62]        | <b>0.000</b>                     |
| CD3+ CD4- CD8-       | 3.60 [2.30,7.60]        | 4.30 [2.60,7.40]        | 0.979                            |
| CD3+ CD4+ CD8+       | 0.65 [0.30,1.10]        | 0.80 [0.50,1.50]        | <b>0.000</b>                     |

Supplementary Table 6. Immunosenescence Parametres by CMV and Gender

|                      | Male CMV Negative<br>N=35 |               | Female CMV Negative<br>N=52 |               | Mann-Whitney test<br>p-value | Male CMV Positive<br>N=190 |               | Female CMV Positive<br>N=320 |               | Mann-Whitney test<br>p-value |
|----------------------|---------------------------|---------------|-----------------------------|---------------|------------------------------|----------------------------|---------------|------------------------------|---------------|------------------------------|
|                      | (%)                       | Median [IQR]  | (%)                         | Median [IQR]  |                              | (%)                        | Median [IQR]  | (%)                          | Median [IQR]  |                              |
| CD3+                 | 67.30                     | [58.90,77.50] | 73.10                       | [62.45,77.75] | 0.432                        | 70.60                      | [63.60,78.30] | 72.50                        | [64.70,79.40] | 0.119                        |
| CD4                  | 76.10                     | [66.70,81.70] | 77.30                       | [70.10,86.15] | 0.212                        | 57.70                      | [46.10,69.10] | 64.10                        | [52.10,75.50] | <b>0.000</b>                 |
| CD4 CD27-CD28-       | 0.15                      | [0.10,0.80]   | 0.20                        | [0.10,0.40]   | 0.563                        | 6.30                       | [1.80,13.50]  | 4.10                         | [1.70,10.90]  | 0.127                        |
| CD4 CD27-CD28+       | 3.85                      | [2.80,5.60]   | 2.45                        | [1.70,4.50]   | <b>0.006</b>                 | 6.20                       | [3.70,10.50]  | 4.80                         | [2.90,7.90]   | <b>0.001</b>                 |
| CD4 CD27+CD28-       | 0.65                      | [0.30,1.30]   | 0.90                        | [0.50,2.20]   | 0.105                        | 0.50                       | [0.30,0.90]   | 0.50                         | [0.30,0.90]   | 0.229                        |
| CD4 CD27+CD28+       | 94.30                     | [89.00,95.90] | 94.90                       | [92.40,97.05] | 0.142                        | 85.40                      | [72.70,92.50] | 89.10                        | [80.00,93.30] | <b>0.004</b>                 |
| CD4 CM               | 40.55                     | [33.10,51.60] | 34.40                       | [23.55,41.65] | <b>0.017</b>                 | 35.20                      | [27.70,43.20] | 31.30                        | [23.20,40.40] | <b>0.005</b>                 |
| CD4 CM CD27-CD28-    | 0.00                      | [0.00,0.00]   | 0.00                        | [0.00,0.00]   | <b>0.005</b>                 | 0.00                       | [0.00,0.10]   | 0.00                         | [0.00,0.10]   | <b>0.006</b>                 |
| CD4 CM CD27-CD28+    | 3.30                      | [2.40,5.40]   | 2.70                        | [1.85,4.10]   | <b>0.005</b>                 | 3.70                       | [2.40,5.70]   | 3.30                         | [2.30,4.70]   | <b>0.000</b>                 |
| CD4 CM CD27+CD28-    | 0.10                      | [0.10,0.20]   | 0.25                        | [0.10,0.80]   | 0.061                        | 0.10                       | [0.00,0.30]   | 0.10                         | [0.10,0.30]   | 0.944                        |
| CD4 CM CD27+CD28+    | 96.45                     | [94.60,97.20] | 96.70                       | [95.25,97.35] | 0.121                        | 96.00                      | [93.60,97.00] | 96.40                        | [94.90,97.30] | 0.316                        |
| CD4 EM               | 12.60                     | [8.20,19.90]  | 8.95                        | [6.00,12.30]  | 0.139                        | 16.90                      | [10.50,28.60] | 14.50                        | [9.30,22.80]  | 0.082                        |
| CD4 EM CD27-CD28-    | 0.95                      | [0.50,2.20]   | 0.95                        | [0.35,2.35]   | <b>0.043</b>                 | 20.40                      | [9.00,42.10]  | 20.80                        | [7.80,38.60]  | 0.163                        |
| CD4 EM CD27-CD28+    | 22.25                     | [15.20,30.40] | 19.90                       | [15.15,22.55] | 0.597                        | 24.30                      | [18.60,30.30] | 22.00                        | [16.50,28.40] | <b>0.019</b>                 |
| CD4 EM CD27+CD28-    | 0.60                      | [0.30,1.00]   | 0.90                        | [0.30,1.55]   | 0.324                        | 0.40                       | [0.20,0.60]   | 0.40                         | [0.20,0.70]   | 0.437                        |
| CD4 EM CD27+CD28+    | 74.70                     | [53.10,81.60] | 77.25                       | [72.70,82.55] | 0.189                        | 48.30                      | [31.20,64.40] | 51.40                        | [37.90,68.30] | <b>0.013</b>                 |
| CD4 NAIVE            | 43.60                     | [23.60,52.90] | 53.00                       | [39.35,66.40] | 0.237                        | 36.90                      | [21.90,47.70] | 45.50                        | [32.10,57.60] | 0.059                        |
| CD4 NAIVE CD27-CD28- | 0.00                      | [0.00,0.00]   | 0.00                        | [0.00,0.00]   | <b>0.047</b>                 | 0.00                       | [0.00,0.10]   | 0.00                         | [0.00,0.00]   | <b>0.022</b>                 |
| CD4 NAIVE CD27-CD28+ | 0.00                      | [0.00,0.10]   | 0.00                        | [0.00,0.10]   | 0.828                        | 0.10                       | [0.00,0.20]   | 0.00                         | [0.00,0.10]   | <b>0.002</b>                 |
| CD4 NAIVE CD27+CD28- | 0.55                      | [0.20,0.80]   | 0.50                        | [0.30,1.55]   | 0.084                        | 0.40                       | [0.20,0.90]   | 0.40                         | [0.20,0.70]   | <b>0.030</b>                 |
| CD4 NAIVE CD27+CD28+ | 99.35                     | [99.00,99.60] | 99.40                       | [98.45,99.60] | 0.407                        | 99.40                      | [98.80,99.70] | 99.40                        | [98.90,99.70] | 0.783                        |
| CD4 TEMRA            | 0.80                      | [0.60,1.30]   | 0.60                        | [0.40,1.00]   | 0.571                        | 1.70                       | [0.70,3.90]   | 1.60                         | [0.80,3.90]   | 0.292                        |
| CD4 TEMRA CD27-CD28- | 3.85                      | [1.80,15.00]  | 4.50                        | [1.70,9.80]   | 0.758                        | 46.75                      | [15.10,74.50] | 46.00                        | [18.40,71.20] | 0.982                        |
| CD4 TEMRA CD27-CD28+ | 7.90                      | [4.00,15.90]  | 9.15                        | [4.55,14.45]  | 0.869                        | 11.50                      | [6.70,18.20]  | 10.00                        | [5.50,16.10]  | <b>0.042</b>                 |
| CD4 TEMRA CD27+CD28- | 1.10                      | [0.70,3.60]   | 2.85                        | [1.80,5.35]   | <b>0.018</b>                 | 1.20                       | [0.30,2.60]   | 1.20                         | [0.50,2.60]   | 0.436                        |
| CD4 TEMRA CD27+CD28+ | 81.10                     | [63.30,89.50] | 79.70                       | [71.55,86.95] | 0.984                        | 36.75                      | [10.30,63.10] | 35.80                        | [16.10,64.60] | 0.292                        |
| CD8+                 | 17.90                     | [12.50,23.10] | 15.00                       | [9.90,22.05]  | 0.256                        | 32.60                      | [22.50,44.90] | 26.50                        | [18.00,38.20] | <b>0.000</b>                 |
| CD8 CD27-CD28-       | 13.80                     | [8.40,33.60]  | 14.10                       | [6.80,30.50]  | 0.659                        | 59.60                      | [41.20,72.80] | 54.90                        | [36.90,68.00] | <b>0.029</b>                 |
| CD8 CD27-CD28+       | 5.00                      | [4.00,6.60]   | 3.00                        | [2.05,4.75]   | <b>0.001</b>                 | 4.10                       | [2.80,5.80]   | 3.60                         | [2.50,5.00]   | <b>0.018</b>                 |
| CD8 CD27+CD28-       | 14.60                     | [6.90,22.80]  | 15.40                       | [11.00,23.00] | 0.400                        | 8.90                       | [4.90,14.30]  | 8.40                         | [5.70,12.70]  | 0.480                        |
| CD8 CD27+CD28+       | 56.20                     | [40.20,71.80] | 60.15                       | [47.90,76.05] | 0.518                        | 24.20                      | [15.50,38.20] | 29.40                        | [19.90,47.70] | <b>0.001</b>                 |
| CD8 CD45RA-CD27-     | 6.25                      | [4.50,9.80]   | 4.10                        | [2.30,7.85]   | <b>0.019</b>                 | 9.90                       | [5.20,18.20]  | 7.20                         | [4.20,12.40]  | <b>0.001</b>                 |
| CD8 CD45RA-CD27+     | 37.75                     | [16.80,51.20] | 29.25                       | [22.35,39.80] | 0.432                        | 15.40                      | [8.80,25.30]  | 15.40                        | [9.10,24.50]  | 0.814                        |
| CD8 CD45RA+CD27-     | 14.05                     | [6.30,33.20]  | 12.50                       | [5.90,24.05]  | 0.548                        | 50.60                      | [34.20,62.80] | 48.70                        | [32.50,61.70] | 0.485                        |
| CD8 CD45RA+CD27+     | 32.80                     | [25.00,47.00] | 43.05                       | [32.45,60.35] | <b>0.031</b>                 | 16.50                      | [10.50,27.40] | 22.00                        | [14.50,33.70] | <b>0.000</b>                 |
| CD8 CM               | 15.95                     | [7.00,25.10]  | 11.75                       | [8.15,19.20]  | 0.453                        | 5.80                       | [3.30,10.80]  | 6.40                         | [3.80,11.60]  | 0.190                        |
| CD8 CM CD27-CD28-    | 0.40                      | [0.00,1.60]   | 0.20                        | [0.00,0.50]   | 0.224                        | 0.80                       | [0.10,2.10]   | 0.50                         | [0.10,1.70]   | <b>0.002</b>                 |
| CD8 CM CD27-CD28+    | 6.20                      | [4.30,7.90]   | 3.60                        | [2.30,5.15]   | 0.099                        | 5.75                       | [3.50,8.40]   | 4.40                         | [2.50,6.60]   | <b>0.000</b>                 |
| CD8 CM CD27+CD28-    | 0.75                      | [0.20,1.50]   | 1.20                        | [0.50,1.85]   | 0.292                        | 1.00                       | [0.30,2.20]   | 1.00                         | [0.40,1.90]   | 0.082                        |
| CD8 CM CD27+CD28+    | 91.00                     | [88.60,94.00] | 94.80                       | [91.65,96.15] | <b>0.000</b>                 | 91.70                      | [87.20,93.90] | 93.30                        | [89.40,95.50] | <b>0.000</b>                 |
| CD8 EM               | 25.20                     | [18.10,36.00] | 21.85                       | [14.00,32.15] | 0.278                        | 21.50                      | [14.60,31.00] | 18.40                        | [11.70,25.30] | 0.970                        |
| CD8 EM CD27-CD28-    | 6.30                      | [4.60,12.50]  | 8.65                        | [3.70,15.40]  | <b>0.005</b>                 | 35.30                      | [16.50,58.70] | 33.90                        | [15.30,53.10] | <b>0.000</b>                 |
| CD8 EM CD27-CD28+    | 9.20                      | [7.20,13.30]  | 6.55                        | [4.90,10.60]  | 0.696                        | 7.90                       | [4.70,11.40]  | 7.20                         | [5.00,10.70]  | 0.181                        |
| CD8 EM CD27+CD28-    | 9.35                      | [5.70,20.30]  | 13.45                       | [8.20,22.05]  | <b>0.033</b>                 | 8.10                       | [4.70,13.40]  | 8.80                         | [5.30,13.20]  | 0.312                        |
| CD8 EM CD27+CD28+    | 60.50                     | [52.50,75.40] | 65.40                       | [52.50,76.85] | 0.178                        | 43.00                      | [21.30,57.40] | 45.70                        | [28.60,61.80] | 0.361                        |
| CD8 NAIVE            | 12.65                     | [6.20,21.50]  | 15.85                       | [8.75,36.50]  | 0.586                        | 4.90                       | [1.80,9.40]   | 7.60                         | [4.00,16.60]  | <b>0.032</b>                 |
| CD8 NAIVE CD27-CD28- | 0.55                      | [0.20,1.10]   | 0.20                        | [0.05,0.70]   | 0.128                        | 1.20                       | [0.40,4.70]   | 0.90                         | [0.30,2.90]   | 0.056                        |
| CD8 NAIVE CD27-CD28+ | 0.20                      | [0.00,0.40]   | 0.10                        | [0.00,0.20]   | 0.095                        | 0.30                       | [0.00,0.80]   | 0.20                         | [0.00,0.50]   | 0.071                        |
| CD8 NAIVE CD27+CD28- | 5.05                      | [3.60,8.30]   | 6.90                        | [3.50,11.65]  | 0.307                        | 5.20                       | [3.20,9.50]   | 4.90                         | [2.80,7.60]   | 0.101                        |
| CD8 NAIVE CD27+CD28+ | 93.35                     | [89.30,95.70] | 92.70                       | [88.00,95.45] | 0.666                        | 90.80                      | [85.50,94.90] | 93.00                        | [87.70,95.50] | <b>0.024</b>                 |
| CD8 TEMRA            | 35.00                     | [18.40,58.50] | 30.95                       | [18.35,48.05] | 0.498                        | 57.20                      | [45.70,69.40] | 57.00                        | [42.10,69.60] | 0.229                        |
| CD8 TEMRA CD27-CD28- | 43.25                     | [24.10,58.70] | 33.25                       | [23.25,58.95] | 0.485                        | 80.70                      | [66.70,88.40] | 79.10                        | [67.50,86.50] | 0.232                        |
| CD8 TEMRA CD27-CD28+ | 2.80                      | [2.00,4.60]   | 2.40                        | [1.50,3.90]   | 0.327                        | 2.50                       | [1.60,3.80]   | 2.50                         | [1.70,4.10]   | 0.452                        |
| CD8 TEMRA CD27+CD28- | 25.90                     | [16.30,37.90] | 31.70                       | [20.15,43.65] | 0.372                        | 10.70                      | [5.20,18.50]  | 10.70                        | [6.20,17.20]  | 0.988                        |
| CD8 TEMRA CD27+CD28+ | 21.75                     | [12.00,32.40] | 23.35                       | [11.40,36.95] | 0.762                        | 4.90                       | [2.70,9.30]   | 6.20                         | [3.30,12.10]  | <b>0.011</b>                 |
| CD4/CD8 RATIO        | 4.16                      | [2.70,6.82]   | 5.19                        | [3.25,8.79]   | 0.222                        | 1.77                       | [1.03,3.02]   | 2.41                         | [1.38,4.06]   | <b>0.000</b>                 |
| CD3+ CD4- CD8-       | 5.10                      | [2.30,9.00]   | 3.25                        | [2.20,6.40]   | 0.250                        | 4.30                       | [2.60,7.60]   | 4.30                         | [2.50,7.30]   | 0.366                        |
| CD3+ CD4+ CD8+       | 0.55                      | [0.30,1.10]   | 0.80                        | [0.30,1.15]   | 0.533                        | 0.60                       | [0.30,1.30]   | 0.80                         | [0.50,1.60]   | <b>0.002</b>                 |

Supplementary Table 7. Cox Regression Models by Biomarkers Tertiles. Cardiovascular Mortality (CVD) vs Non-Cardiovascular Mortality (Non-CVD).

**CVD Mortality Cox Regression Model : CD8 TEMRA**

|                                       |               | N° Individuals | N° Events | Unadjusted         | p            | Adjusted <sup>1</sup> | p            |
|---------------------------------------|---------------|----------------|-----------|--------------------|--------------|-----------------------|--------------|
| Lymphocytes<br>(x 10 <sup>9</sup> /l) | <= 1.42       | 126            | 76        | 1                  | <b>0.031</b> | 1                     | 0.075        |
|                                       | 1.43 - 1.93   | 143            | 78        | 0.84 (0.58 - 1.20) |              | 0.86 (0.60 - 1.24)    |              |
|                                       | 1.94+         | 137            | 61        | 0.60 (0.41 - 0.88) |              | 0.64 (0.43 - 0.95)    |              |
| Basophils<br>(x 10 <sup>9</sup> /l)   | <= .03        | 189            | 91        | 1                  | <b>0.018</b> | 1                     | <b>0.031</b> |
|                                       | .04 - .05     | 128            | 74        | 1.65 (1.17 - 2.32) |              | 1.60 (1.13 - 2.28)    |              |
|                                       | .06+          | 89             | 50        | 1.21 (0.81 - 1.80) |              | 1.20 (0.80 - 1.79)    |              |
| TGF-beta<br>(ng/ml)                   | <= 13.17      | 138            | 86        | 1                  | <b>0.002</b> | 1                     | <b>0.038</b> |
|                                       | 13.18 - 17.36 | 125            | 55        | 0.51 (0.36 - 0.74) |              | 0.62 (0.43 - 0.90)    |              |
|                                       | 17.37+        | 126            | 69        | 0.79 (0.56 - 1.14) |              | 0.87 (0.60 - 1.25)    |              |
| Haemoglobin<br>(g/dl)                 | <= 12.30      | 115            | 71        | 1                  | 0.393        | 1                     | 0.962        |
|                                       | 12.31 - 13.60 | 152            | 75        | 0.85 (0.59 - 1.21) |              | 0.96 (0.67 - 1.38)    |              |
|                                       | 13.61+        | 139            | 69        | 0.78 (0.54 - 1.12) |              | 0.95 (0.66 - 1.38)    |              |
| <b>CD8 TEMRA<br/>(%)</b>              | <= 45.20      | 135            | 60        | 1                  | <b>0.029</b> | 1                     | 0.141        |
|                                       | 45.21 - 63.80 | 126            | 72        | 1.49 (1.03 - 2.14) |              | 1.42 (0.98 - 2.06)    |              |
|                                       | 63.81+        | 122            | 72        | 1.60 (1.11 - 2.31) |              | 1.37 (0.94 - 2.01)    |              |

**CVD Mortality Cox Regression Model : CD8 CD27-CD28+**

|                                       |               | N° Individuals | N° Events | Unadjusted         | p            | Adjusted <sup>1</sup> | p            |
|---------------------------------------|---------------|----------------|-----------|--------------------|--------------|-----------------------|--------------|
| Lymphocytes<br>(x 10 <sup>9</sup> /l) | <= 1.42       | 126            | 76        | 1                  | 0.145        | 1                     | 0.164        |
|                                       | 1.43 - 1.93   | 143            | 78        | 0.92 (0.64 - 1.31) |              | 0.94 (0.65 - 1.36)    |              |
|                                       | 1.94+         | 137            | 61        | 0.69 (0.47 - 1.02) |              | 0.70 (0.47 - 1.04)    |              |
| Basophils<br>(x 10 <sup>9</sup> /l)   | <= .03        | 189            | 91        | 1                  | <b>0.023</b> | 1                     | <b>0.031</b> |
|                                       | .04 - .05     | 128            | 74        | 1.61 (1.15 - 2.28) |              | 1.60 (1.13 - 2.27)    |              |
|                                       | .06+          | 89             | 50        | 1.29 (0.87 - 1.91) |              | 1.27 (0.85 - 1.90)    |              |
| TGF-beta<br>(ng/ml)                   | <= 13.17      | 138            | 86        | 1                  | <b>0.002</b> | 1                     | 0.055        |
|                                       | 13.18 - 17.36 | 125            | 55        | 0.52 (0.36 - 0.75) |              | 0.64 (0.44 - 0.92)    |              |
|                                       | 17.37+        | 126            | 69        | 0.77 (0.54 - 1.10) |              | 0.86 (0.59 - 1.23)    |              |
| Haemoglobin<br>(g/dl)                 | <= 12.30      | 115            | 71        | 1                  | 0.288        | 1                     | 0.944        |
|                                       | 12.31 - 13.60 | 152            | 75        | 0.81 (0.57 - 1.15) |              | 0.96 (0.67 - 1.37)    |              |
|                                       | 13.61+        | 139            | 69        | 0.76 (0.53 - 1.09) |              | 0.94 (0.65 - 1.37)    |              |
| <b>CD8 CD27-<br/>CD28+ (%)</b>        | <= 1.90       | 128            | 78        | 1                  | 0.051        | 1                     | <b>0.029</b> |
|                                       | 1.91 - 3.40   | 129            | 64        | 0.70 (0.49 - 1.00) |              | 0.68 (0.47 - 0.97)    |              |
|                                       | 3.41+         | 126            | 62        | 0.68 (0.47 - 0.96) |              | 0.65 (0.45 - 0.93)    |              |

**Non-CVD Mortality Cox Regression Model : CD8 TEMRA**

|                                       |               | N° Individuals | N° Events | Unadjusted         | p            | Adjusted <sup>1</sup> | p            |
|---------------------------------------|---------------|----------------|-----------|--------------------|--------------|-----------------------|--------------|
| Lymphocytes<br>(x 10 <sup>9</sup> /l) | <= 1.42       | 120            | 70        | 1                  | <b>0.037</b> | 1                     | 0.255        |
|                                       | 1.43 - 1.93   | 121            | 56        | 0.67 (0.45 - 1.00) |              | 0.77 (0.52 - 1.15)    |              |
|                                       | 1.94+         | 132            | 56        | 0.61 (0.41 - 0.91) |              | 0.73 (0.49 - 1.09)    |              |
| Basophils<br>(x 10 <sup>9</sup> /l)   | <= .03        | 190            | 92        | 1                  | 0.930        | 1                     | 0.809        |
|                                       | .04 - .05     | 106            | 52        | 1.06 (0.73 - 1.55) |              | 1.11 (0.75 - 1.63)    |              |
|                                       | .06+          | 77             | 38        | 0.98 (0.65 - 1.50) |              | 0.96 (0.63 - 1.46)    |              |
| TGF-beta<br>(ng/ml)                   | <= 13.17      | 102            | 50        | 1                  | 0.574        | 1                     | 0.770        |
|                                       | 13.18 - 17.36 | 135            | 65        | 0.97 (0.64 - 1.45) |              | 1.03 (0.69 - 1.56)    |              |
|                                       | 17.37+        | 119            | 62        | 1.17 (0.76 - 1.79) |              | 1.15 (0.75 - 1.77)    |              |
| Haemoglobin<br>(g/dl)                 | <= 12.30      | 126            | 82        | 1                  | <b>0.000</b> | 1                     | <b>0.003</b> |
|                                       | 12.31 - 13.60 | 121            | 44        | 0.43 (0.29 - 0.64) |              | 0.53 (0.35 - 0.79)    |              |
|                                       | 13.61+        | 126            | 56        | 0.51 (0.36 - 0.75) |              | 0.60 (0.41 - 0.89)    |              |
| <b>CD8 TEMRA<br/>(%)</b>              | <= 45.20      | 126            | 51        | 1                  | <b>0.031</b> | 1                     | <b>0.030</b> |
|                                       | 45.21 - 63.80 | 114            | 60        | 1.40 (0.94 - 2.07) |              | 1.42 (0.95 - 2.12)    |              |
|                                       | 63.81+        | 112            | 62        | 1.69 (1.14 - 2.51) |              | 1.70 (1.14 - 2.54)    |              |

**Non-CVD Mortality Cox Regression Model : CD8 CD27-CD28+**

|                                       |               | N° Individuals | N° Events | Unadjusted         | p            | Adjusted <sup>1</sup> | p            |
|---------------------------------------|---------------|----------------|-----------|--------------------|--------------|-----------------------|--------------|
| Lymphocytes<br>(x 10 <sup>9</sup> /l) | <= 1.42       | 120            | 70        | 1                  | 0.214        | 1                     | 0.796        |
|                                       | 1.43 - 1.93   | 121            | 56        | 0.78 (0.53 - 1.14) |              | 0.94 (0.63 - 1.40)    |              |
|                                       | 1.94+         | 132            | 56        | 0.71 (0.48 - 1.06) |              | 0.87 (0.58 - 1.30)    |              |
| Basophils<br>(x 10 <sup>9</sup> /l)   | <= .03        | 190            | 92        | 1                  | 0.909        | 1                     | 0.716        |
|                                       | .04 - .05     | 106            | 52        | 1.08 (0.74 - 1.58) |              | 1.16 (0.79 - 1.71)    |              |
|                                       | .06+          | 77             | 38        | 1.01 (0.66 - 1.53) |              | 0.99 (0.65 - 1.51)    |              |
| TGF-beta<br>(ng/ml)                   | <= 13.17      | 102            | 50        | 1                  | 0.662        | 1                     | 0.926        |
|                                       | 13.18 - 17.36 | 135            | 65        | 0.97 (0.65 - 1.46) |              | 1.02 (0.68 - 1.53)    |              |
|                                       | 17.37+        | 119            | 62        | 1.14 (0.75 - 1.75) |              | 1.08 (0.71 - 1.65)    |              |
| Haemoglobin<br>(g/dl)                 | <= 12.30      | 126            | 82        | 1                  | <b>0.000</b> | 1                     | <b>0.001</b> |
|                                       | 12.31 - 13.60 | 121            | 44        | 0.40 (0.27 - 0.59) |              | 0.49 (0.33 - 0.74)    |              |
|                                       | 13.61+        | 126            | 56        | 0.49 (0.34 - 0.70) |              | 0.58 (0.40 - 0.85)    |              |
| <b>CD8 CD27-<br/>CD28+ (%)</b>        | <= 1.90       | 112            | 62        | 1                  | 0.139        | 1                     | <b>0.037</b> |
|                                       | 1.91 - 3.40   | 123            | 58        | 0.85 (0.58 - 1.24) |              | 0.76 (0.51 - 1.11)    |              |
|                                       | 3.41+         | 117            | 53        | 0.67 (0.46 - 1.00) |              | 0.59 (0.39 - 0.88)    |              |

Values are expressed as Mean (Lower, Upper bound of 95%CI). <sup>1</sup>Adjusted for Tertiles of pro BNP, Cancer and Frailty



A. KLRG1 expression in CD8<sup>+</sup> subpopulations

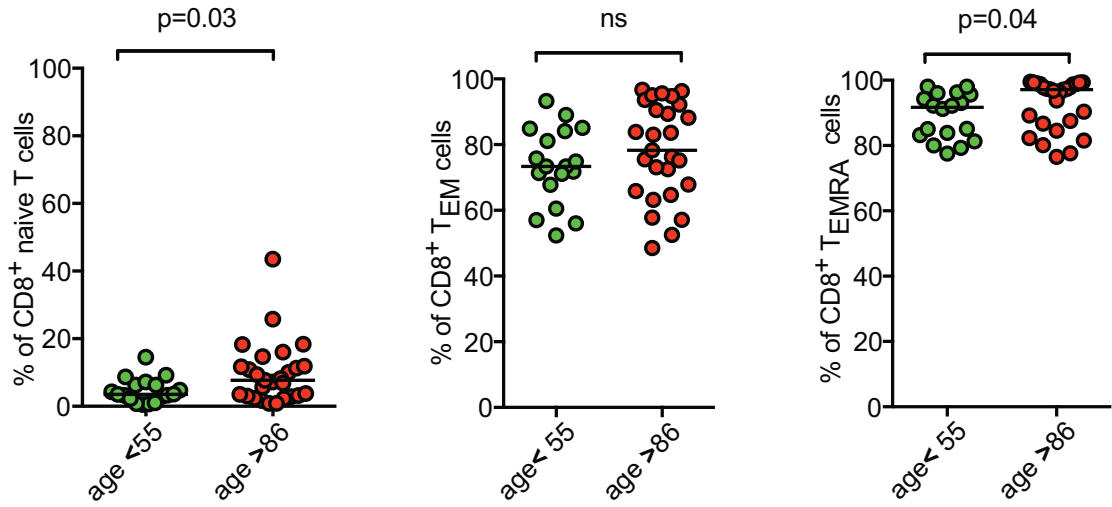

B. Distribution of CD27/CD28 subpopulations in CD8<sup>+</sup> TEMRA cells

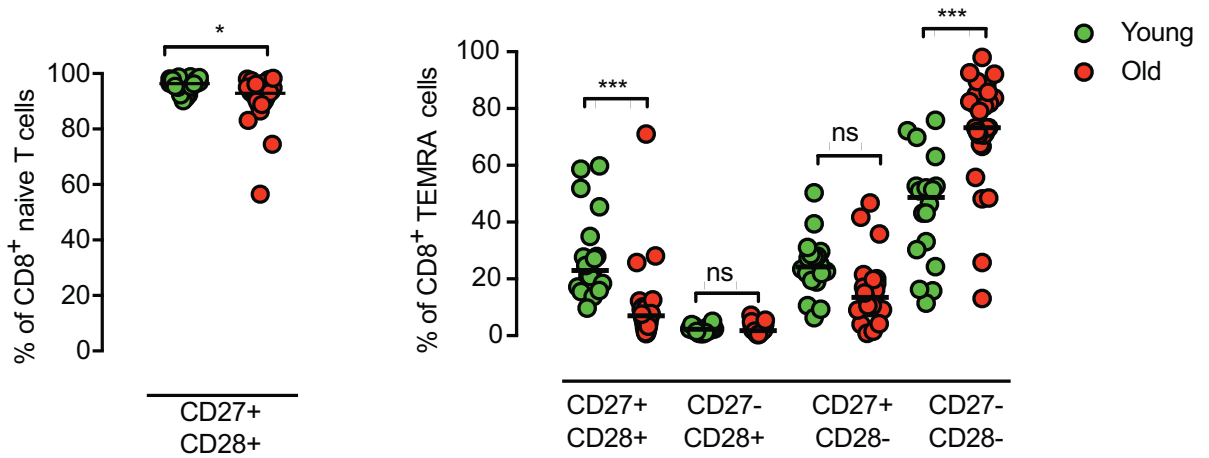

C. KLRG1 expression in CD8<sup>+</sup> TEMRA subpopulations

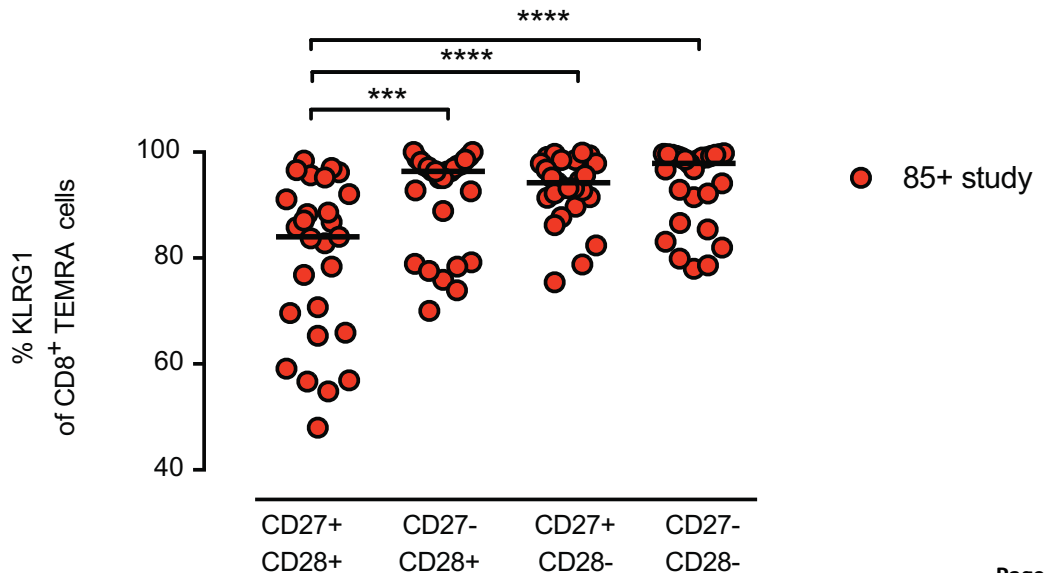

Supplementary Figure 2: Mouse flow-cytometry gating scheme

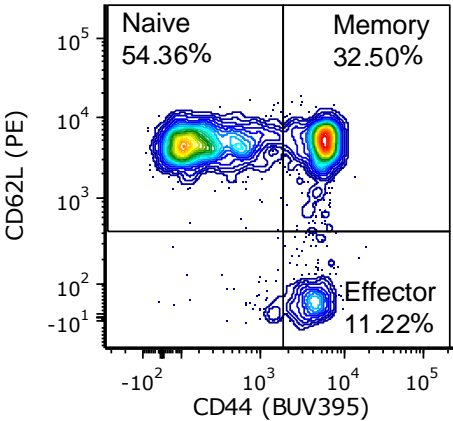

Exp65 - NAV treated old mice #3  
file B5, mouse B13

Supplementary Figure S3. Flowchart on covariates selection

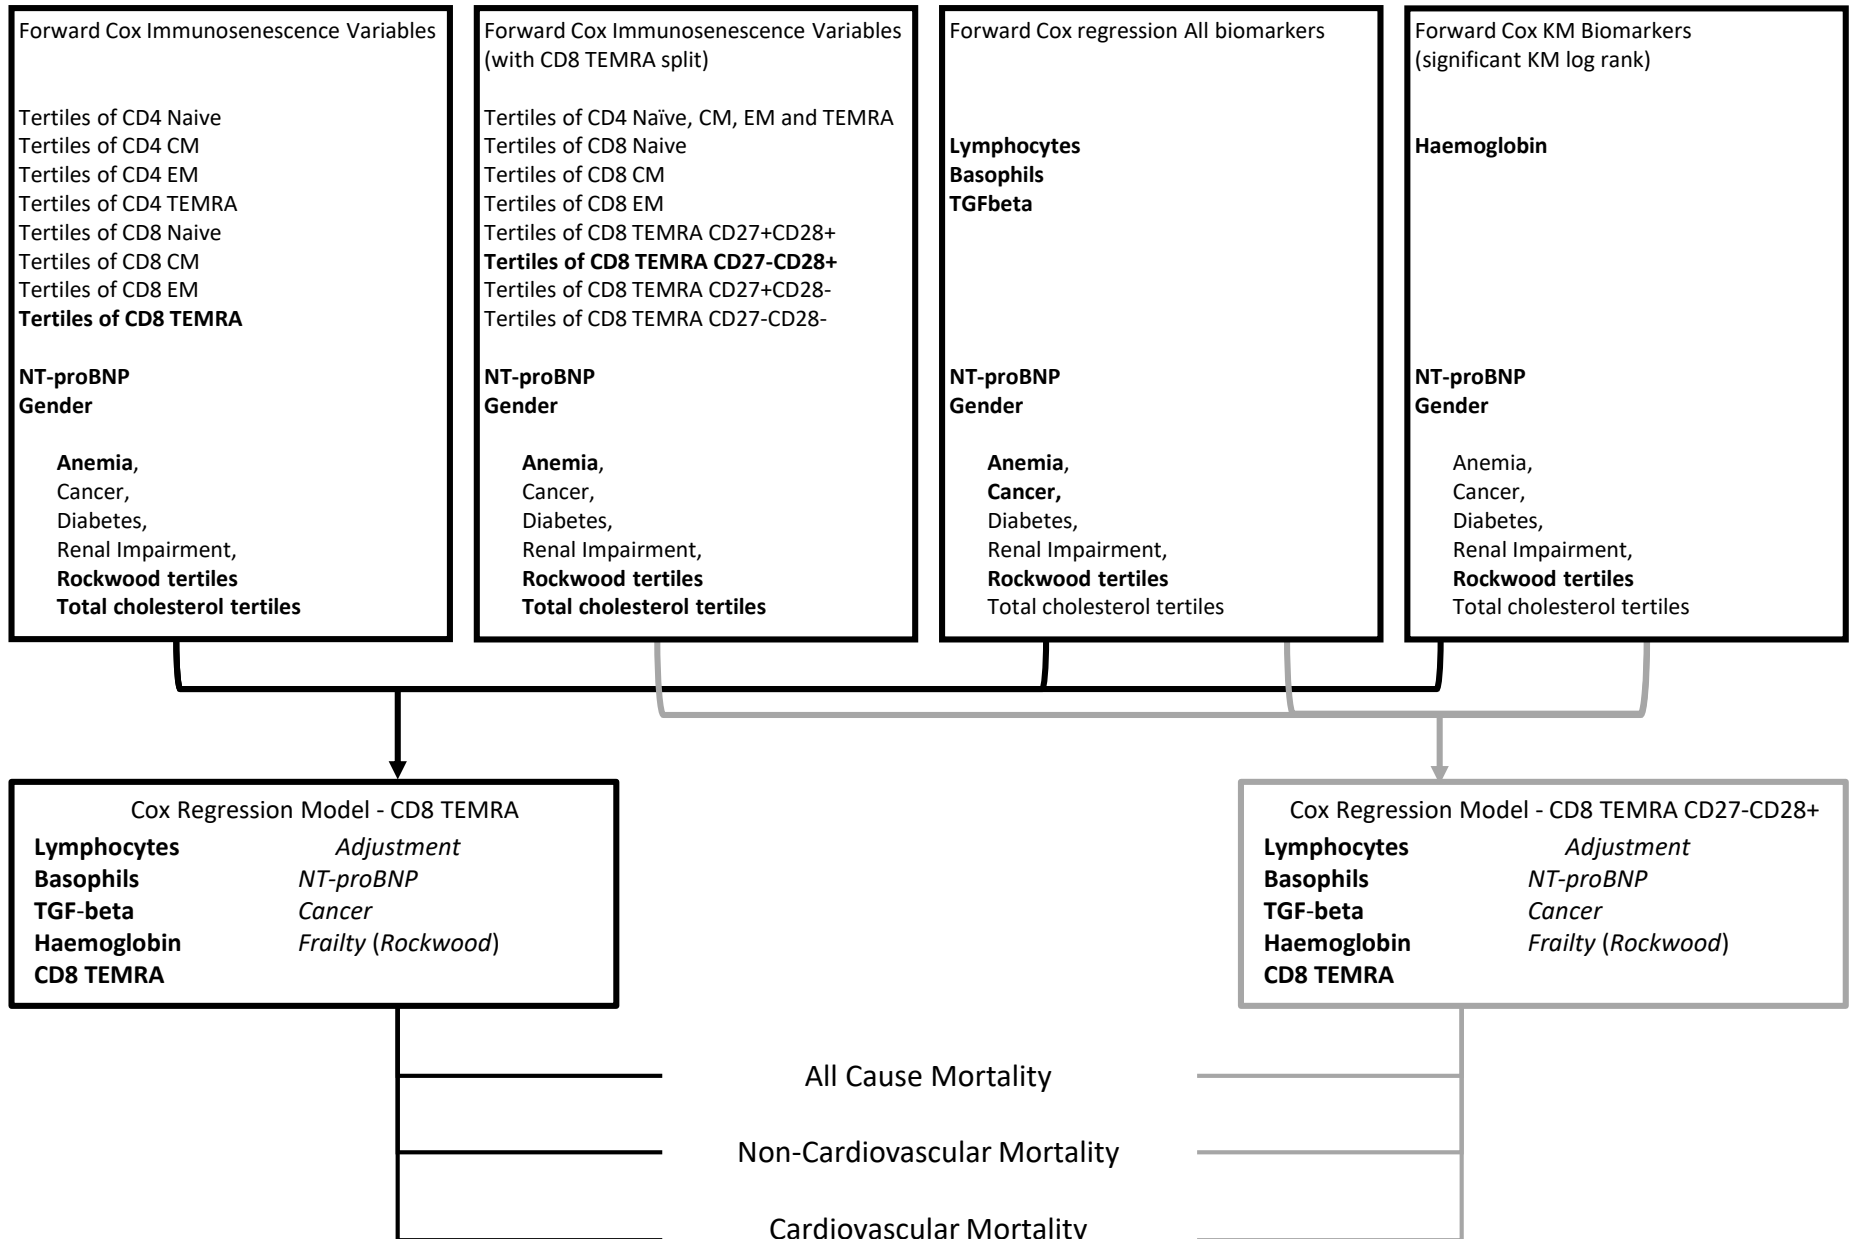

Supplement: MOESM1 [file 41514_2019_41_MOESM1_ESM.pdf]
